# Supplementary material for: Determination of the Prevalence of Knee and Hip Clinical Osteoarthritis in the Active Professional Male Footballer and Its Association with Pain, Function, Injury and Surgery
Source: MDPI journal article supplement (doi:10.3390/sports11070136), 2023-07-18
Supplement: s1 [file s1]

## Supplementary file D: PROMIS-GH

PROMIS<sup>®</sup> Scale v1.2 – Global Health

### Global Health

Please respond to each question or statement by marking one box per row.

|           |                                                                                                                                                                                                                                        | Excellent                     | Very good                     | Good                          | Fair                          | Poor                          |
|-----------|----------------------------------------------------------------------------------------------------------------------------------------------------------------------------------------------------------------------------------------|-------------------------------|-------------------------------|-------------------------------|-------------------------------|-------------------------------|
| Global01  | In general, would you say your health is: .....                                                                                                                                                                                        | <input type="checkbox"/><br>5 | <input type="checkbox"/><br>4 | <input type="checkbox"/><br>3 | <input type="checkbox"/><br>2 | <input type="checkbox"/><br>1 |
| Global02  | In general, would you say your quality of life is: .....                                                                                                                                                                               | <input type="checkbox"/><br>5 | <input type="checkbox"/><br>4 | <input type="checkbox"/><br>3 | <input type="checkbox"/><br>2 | <input type="checkbox"/><br>1 |
| Global03  | In general, how would you rate your physical health? .....                                                                                                                                                                             | <input type="checkbox"/><br>5 | <input type="checkbox"/><br>4 | <input type="checkbox"/><br>3 | <input type="checkbox"/><br>2 | <input type="checkbox"/><br>1 |
| Global04  | In general, how would you rate your mental health, including your mood and your ability to think? .....                                                                                                                                | <input type="checkbox"/><br>5 | <input type="checkbox"/><br>4 | <input type="checkbox"/><br>3 | <input type="checkbox"/><br>2 | <input type="checkbox"/><br>1 |
| Global05  | In general, how would you rate your satisfaction with your social activities and relationships? .....                                                                                                                                  | <input type="checkbox"/><br>5 | <input type="checkbox"/><br>4 | <input type="checkbox"/><br>3 | <input type="checkbox"/><br>2 | <input type="checkbox"/><br>1 |
| Global09r | In general, please rate how well you carry out your usual social activities and roles. (This includes activities at home, at work and in your community, and responsibilities as a parent, child, spouse, employee, friend, etc.)..... | <input type="checkbox"/><br>5 | <input type="checkbox"/><br>4 | <input type="checkbox"/><br>3 | <input type="checkbox"/><br>2 | <input type="checkbox"/><br>1 |
|           |                                                                                                                                                                                                                                        | Completely                    | Mostly                        | Moderately                    | A little                      | Not at all                    |
| Global06  | To what extent are you able to carry out your everyday physical activities such as walking, climbing stairs, carrying groceries, or moving a chair? .....                                                                              | <input type="checkbox"/><br>5 | <input type="checkbox"/><br>4 | <input type="checkbox"/><br>3 | <input type="checkbox"/><br>2 | <input type="checkbox"/><br>1 |

**In the past 7 days...**

|           |                                                                                                               | Never                                    | Rarely                        | Sometimes                     | Often                         | Always                        |                               |                               |                               |                               |                               |                                                         |
|-----------|---------------------------------------------------------------------------------------------------------------|------------------------------------------|-------------------------------|-------------------------------|-------------------------------|-------------------------------|-------------------------------|-------------------------------|-------------------------------|-------------------------------|-------------------------------|---------------------------------------------------------|
| Global10r | How often have you been bothered by emotional problems such as feeling anxious, depressed or irritable? ..... | <input type="checkbox"/><br>5            | <input type="checkbox"/><br>4 | <input type="checkbox"/><br>3 | <input type="checkbox"/><br>2 | <input type="checkbox"/><br>1 |                               |                               |                               |                               |                               |                                                         |
|           |                                                                                                               |                                          |                               |                               |                               |                               |                               |                               |                               |                               |                               |                                                         |
|           |                                                                                                               | None                                     | Mild                          | Moderate                      | Severe                        | Very severe                   |                               |                               |                               |                               |                               |                                                         |
| Global08r | How would you rate your fatigue on average? .....                                                             | <input type="checkbox"/><br>5            | <input type="checkbox"/><br>4 | <input type="checkbox"/><br>3 | <input type="checkbox"/><br>2 | <input type="checkbox"/><br>1 |                               |                               |                               |                               |                               |                                                         |
|           |                                                                                                               |                                          |                               |                               |                               |                               |                               |                               |                               |                               |                               |                                                         |
| Global07r | How would you rate your pain on average? .....                                                                | <input type="checkbox"/><br>0<br>No pain | <input type="checkbox"/><br>1 | <input type="checkbox"/><br>2 | <input type="checkbox"/><br>3 | <input type="checkbox"/><br>4 | <input type="checkbox"/><br>5 | <input type="checkbox"/><br>6 | <input type="checkbox"/><br>7 | <input type="checkbox"/><br>8 | <input type="checkbox"/><br>9 | <input type="checkbox"/><br>10<br>Worst pain imaginable |
