# Supplementary material for: Determination of the Prevalence of Knee and Hip Clinical Osteoarthritis in the Active Professional Male Footballer and Its Association with Pain, Function, Injury and Surgery
Source: MDPI journal article supplement (doi:10.3390/sports11070136), 2023-07-18
Supplement: s1 [file s1]

## Supplementary file B: KOOS-PS

Knee injury and Osteoarthritis Outcome Score (KOOS) – Physical Function Shortform  
(KOOS-PS) English version

### KOOS-Physical Function Shortform (KOOS-PS)

Today's date: \_\_\_\_/\_\_\_\_/\_\_\_\_ Date of birth: \_\_\_\_/\_\_\_\_/\_\_\_\_

Name: \_\_\_\_\_

**INSTRUCTIONS:** This survey asks for your view about your knee. This information will help us keep track of how well you are able to perform different activities.

Answer every question by ticking the appropriate box, only one box for each question. If you are unsure about how to answer a question, please give the best answer you can so that you answer all the questions.

The following questions concern your level of function in performing usual daily activities and higher level activities. For each of the following activities, please indicate the degree of difficulty you have experienced in the **last week** due to your knee problem.

1. Rising from bed

| None                     | Mild                     | Moderate                 | Severe                   | Extreme                  |
|--------------------------|--------------------------|--------------------------|--------------------------|--------------------------|
| <input type="checkbox"/> |

2. Putting on socks/stockings

| None                     | Mild                     | Moderate                 | Severe                   | Extreme                  |
|--------------------------|--------------------------|--------------------------|--------------------------|--------------------------|
| <input type="checkbox"/> |

3. Rising from sitting

| None                     | Mild                     | Moderate                 | Severe                   | Extreme                  |
|--------------------------|--------------------------|--------------------------|--------------------------|--------------------------|
| <input type="checkbox"/> |

4. Bending to floor

| None                     | Mild                     | Moderate                 | Severe                   | Extreme                  |
|--------------------------|--------------------------|--------------------------|--------------------------|--------------------------|
| <input type="checkbox"/> |

5. Twisting/pivoting on your injured knee

| None                     | Mild                     | Moderate                 | Severe                   | Extreme                  |
|--------------------------|--------------------------|--------------------------|--------------------------|--------------------------|
| <input type="checkbox"/> |

6. Kneeling

| None                     | Mild                     | Moderate                 | Severe                   | Extreme                  |
|--------------------------|--------------------------|--------------------------|--------------------------|--------------------------|
| <input type="checkbox"/> |

7. Squatting

| None                     | Mild                     | Moderate                 | Severe                   | Extreme                  |
|--------------------------|--------------------------|--------------------------|--------------------------|--------------------------|
| <input type="checkbox"/> |
